# Supplementary material for: Morphology of Nasonov and Tergal Glands in Apis mellifera Rebels
Source: MDPI journal article supplement (doi:10.3390/insects13050401), 2022-04-22
Supplement: s1 [file s1]

## Supplementary material

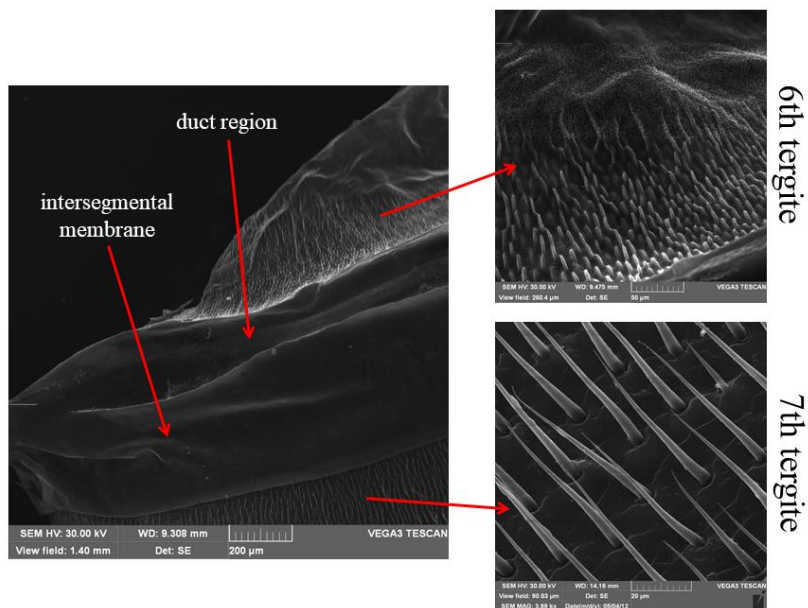

Figure S1. Nasonov gland in normal workers observed under SEM (according to Ptaszyńska et al.'s (2014; DOI: 10.3896/IBRA.1.53.5.02) method).
